# Supplementary material
Source: PubMed Central journal article supplement (PMC5089170)

# Evoked Response Map for Unrelated Printed Words

$t = 3.97$ ; voxelwise  $p = .001$ ; cluster corrected at  $p = .05$

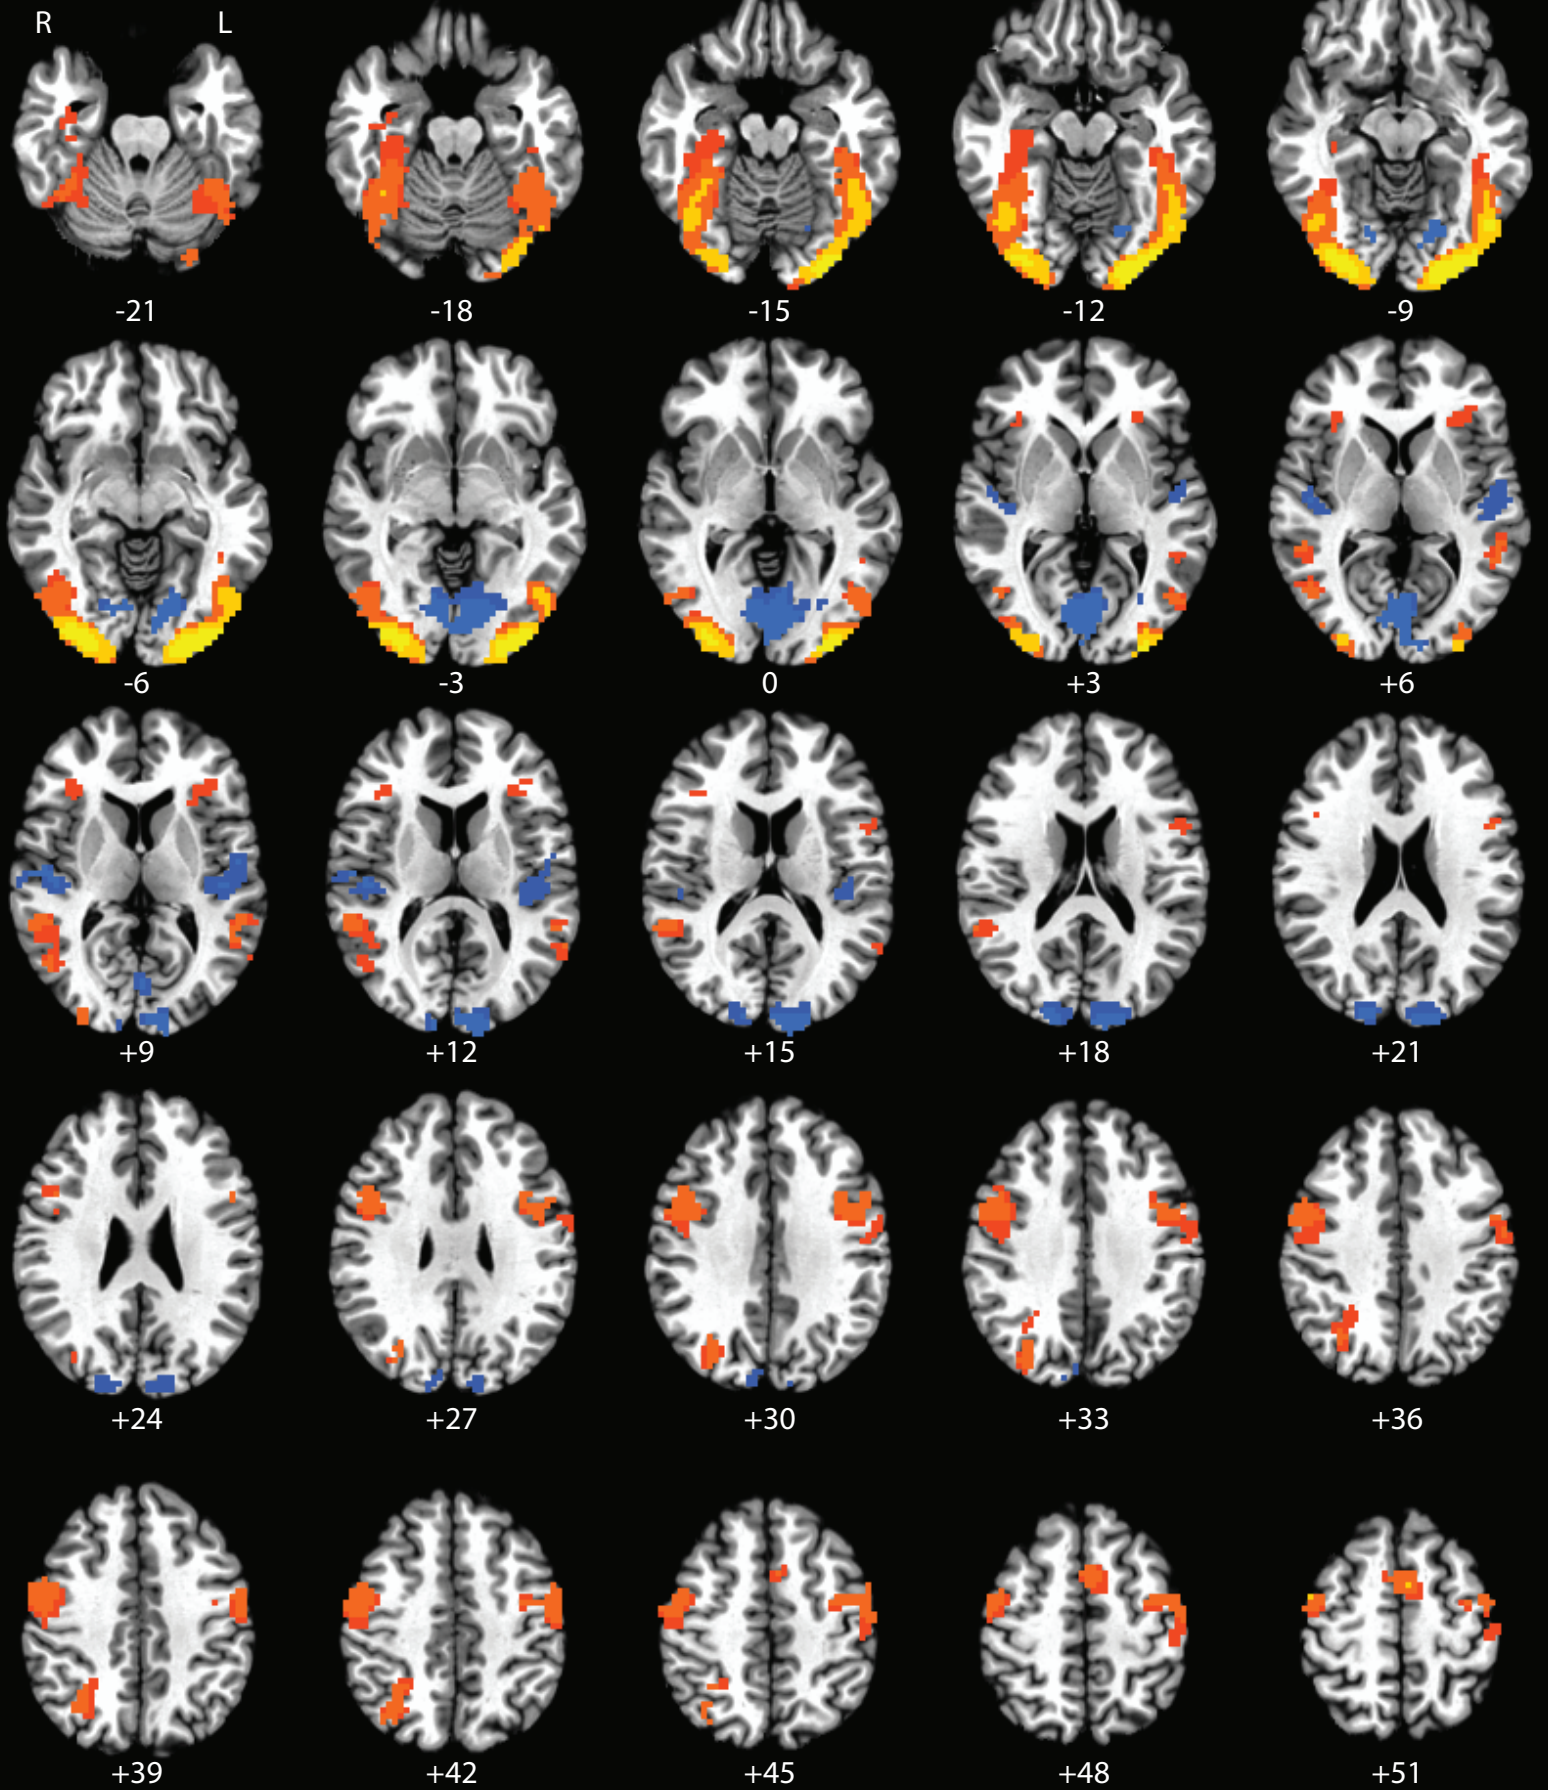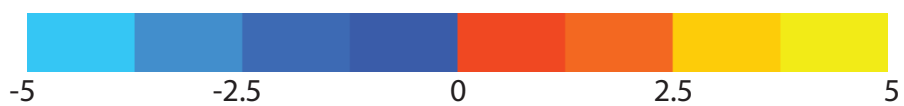

Supplement: NIHMS816621-supplement-Supplementary_Figure_1.pdf [file NIHMS816621-supplement-Supplementary_Figure_1.pdf]

# Evoked Response Map for O<sup>+</sup>P<sup>+</sup> Words

$t = 3.97$ ; voxelwise  $p = .001$ ; cluster corrected at  $p = .05$

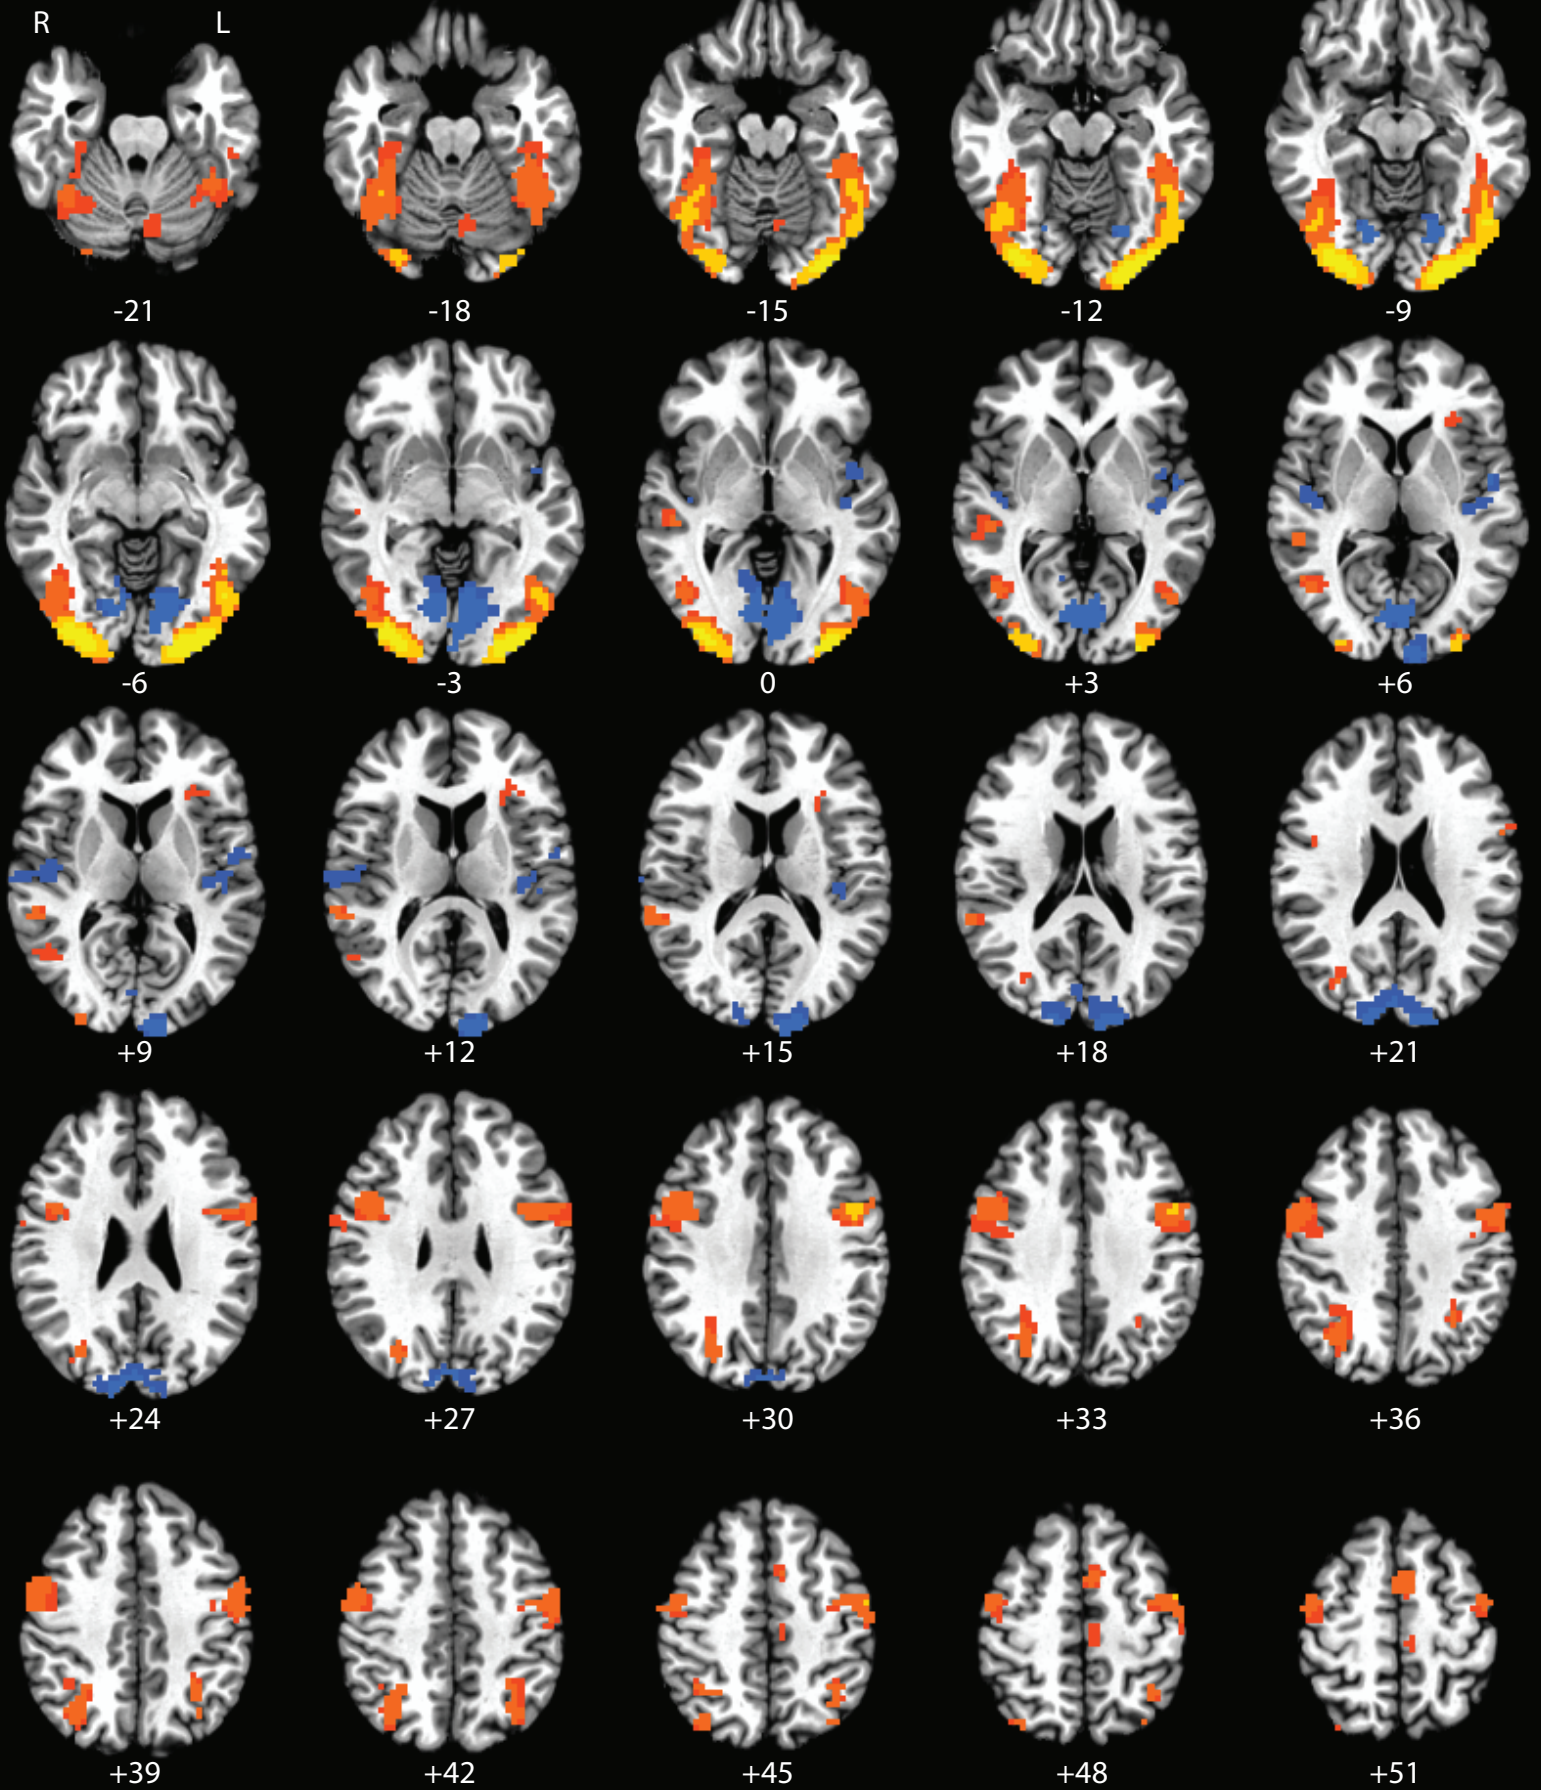

Supplement: NIHMS816621-supplement-Supplementary_Figure_2.pdf [file NIHMS816621-supplement-Supplementary_Figure_2.pdf]

# Evoked Response Map for O<sup>+</sup>P<sup>-</sup> Words

$t = 3.97$ ; voxelwise  $p = .001$ ; cluster corrected at  $p = .05$

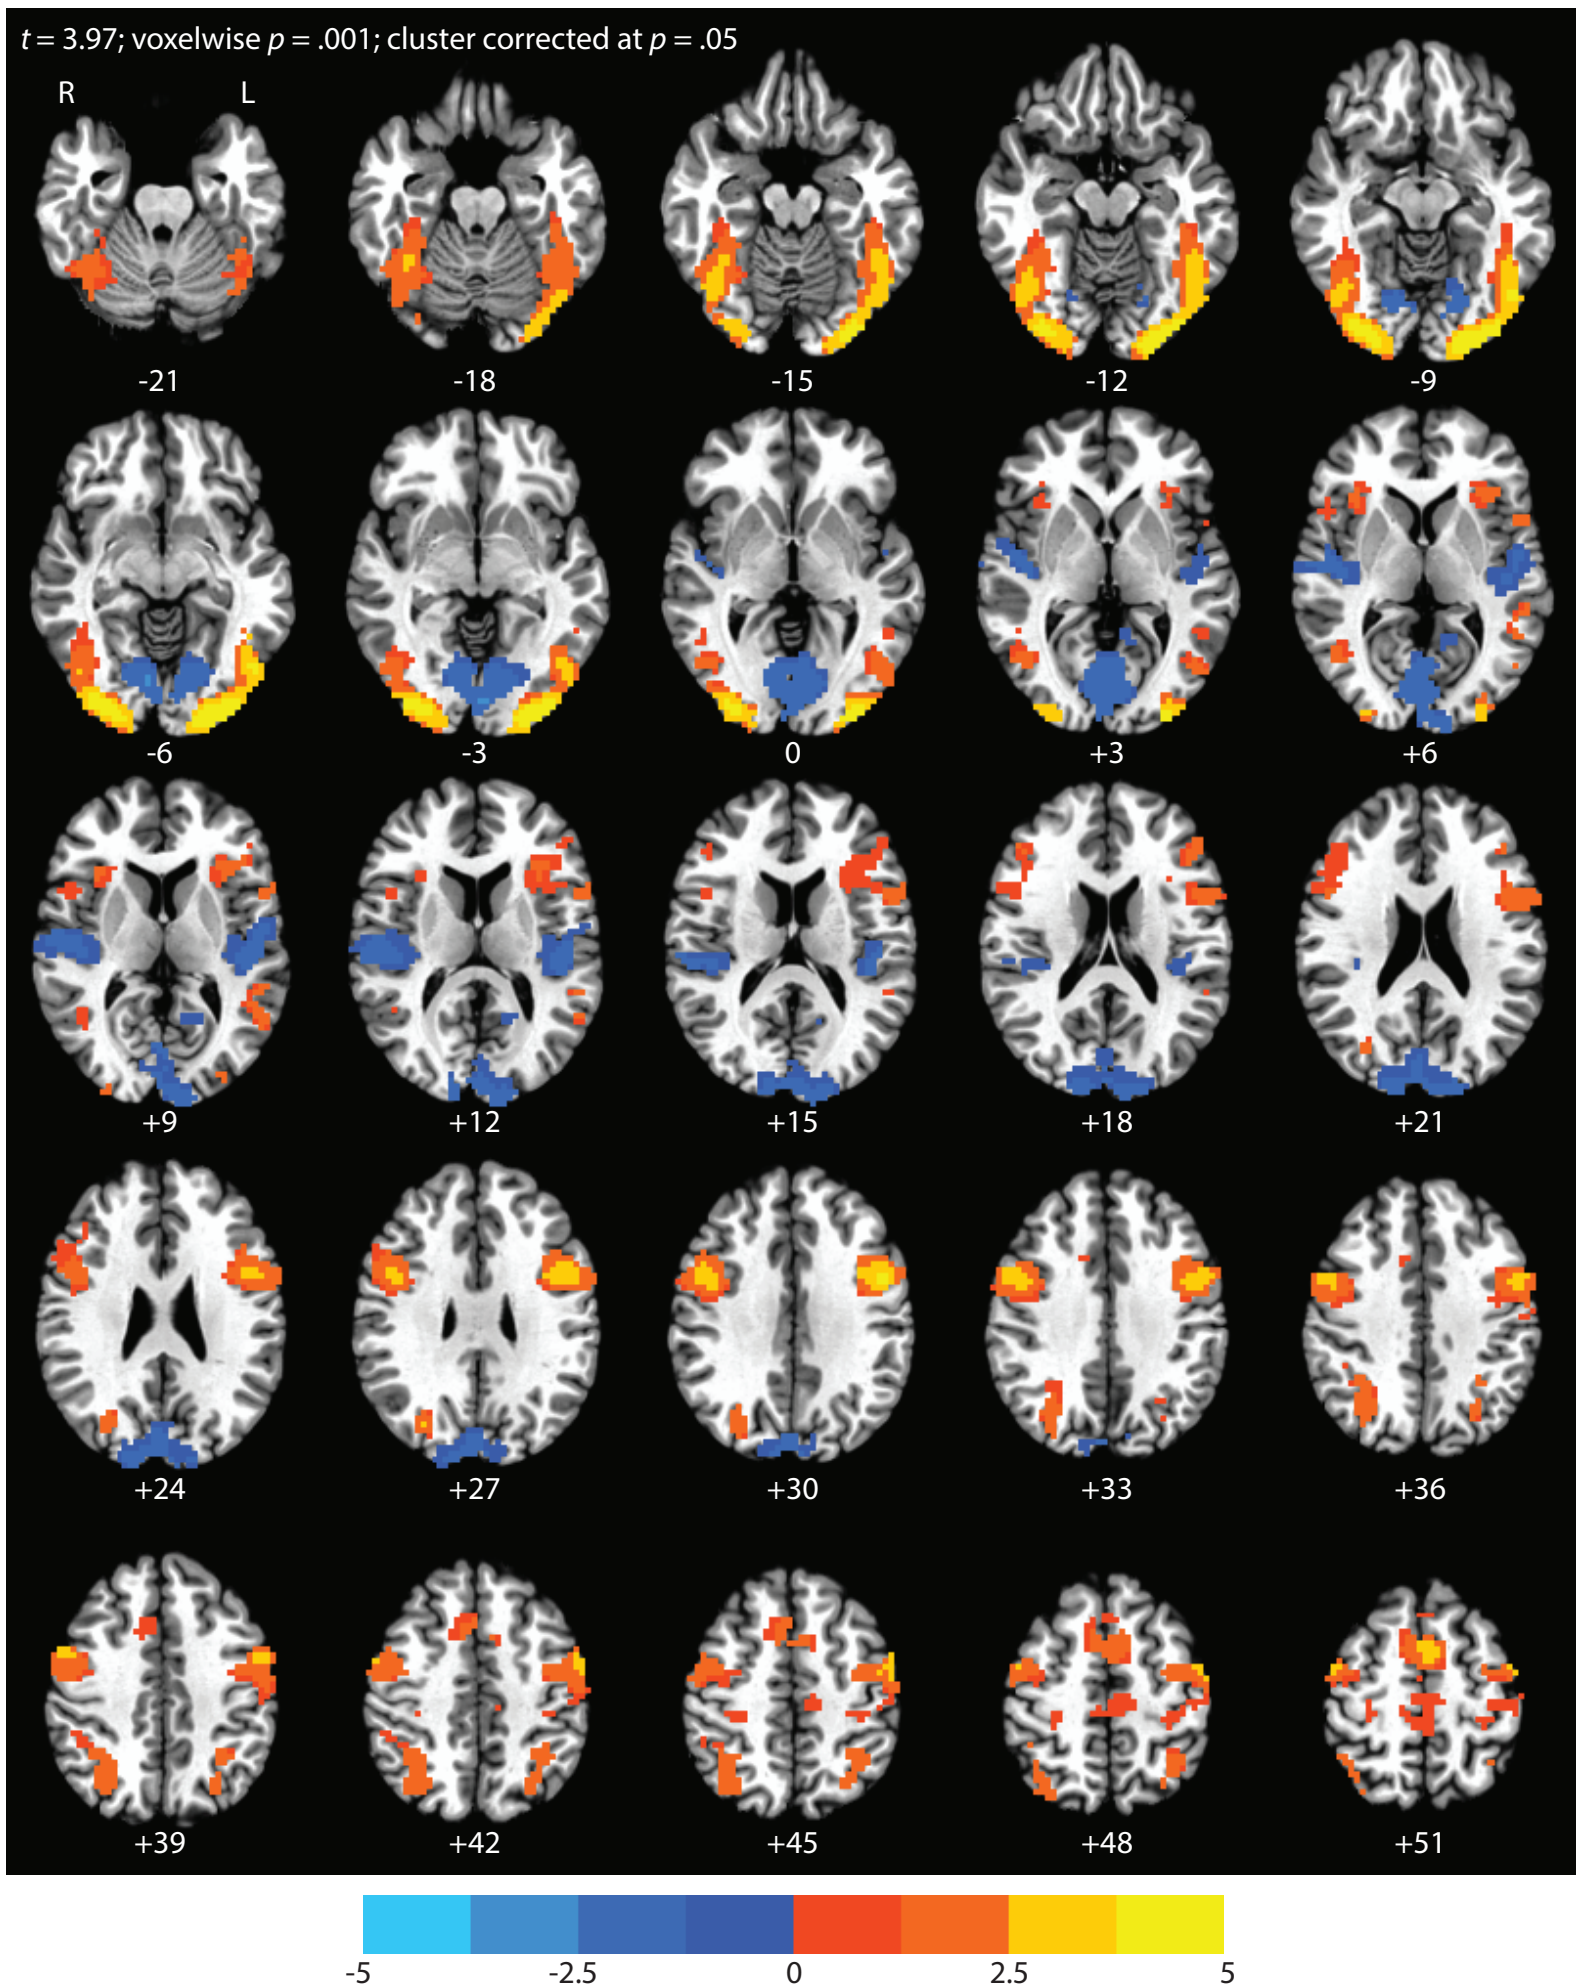

Supplement: NIHMS816621-supplement-Supplementary_Figure_3.pdf [file NIHMS816621-supplement-Supplementary_Figure_3.pdf]

# Evoked Response Map for Semantically Related Words

$t = 3.97$ ; voxelwise  $p = .001$ ; cluster corrected at  $p = .05$

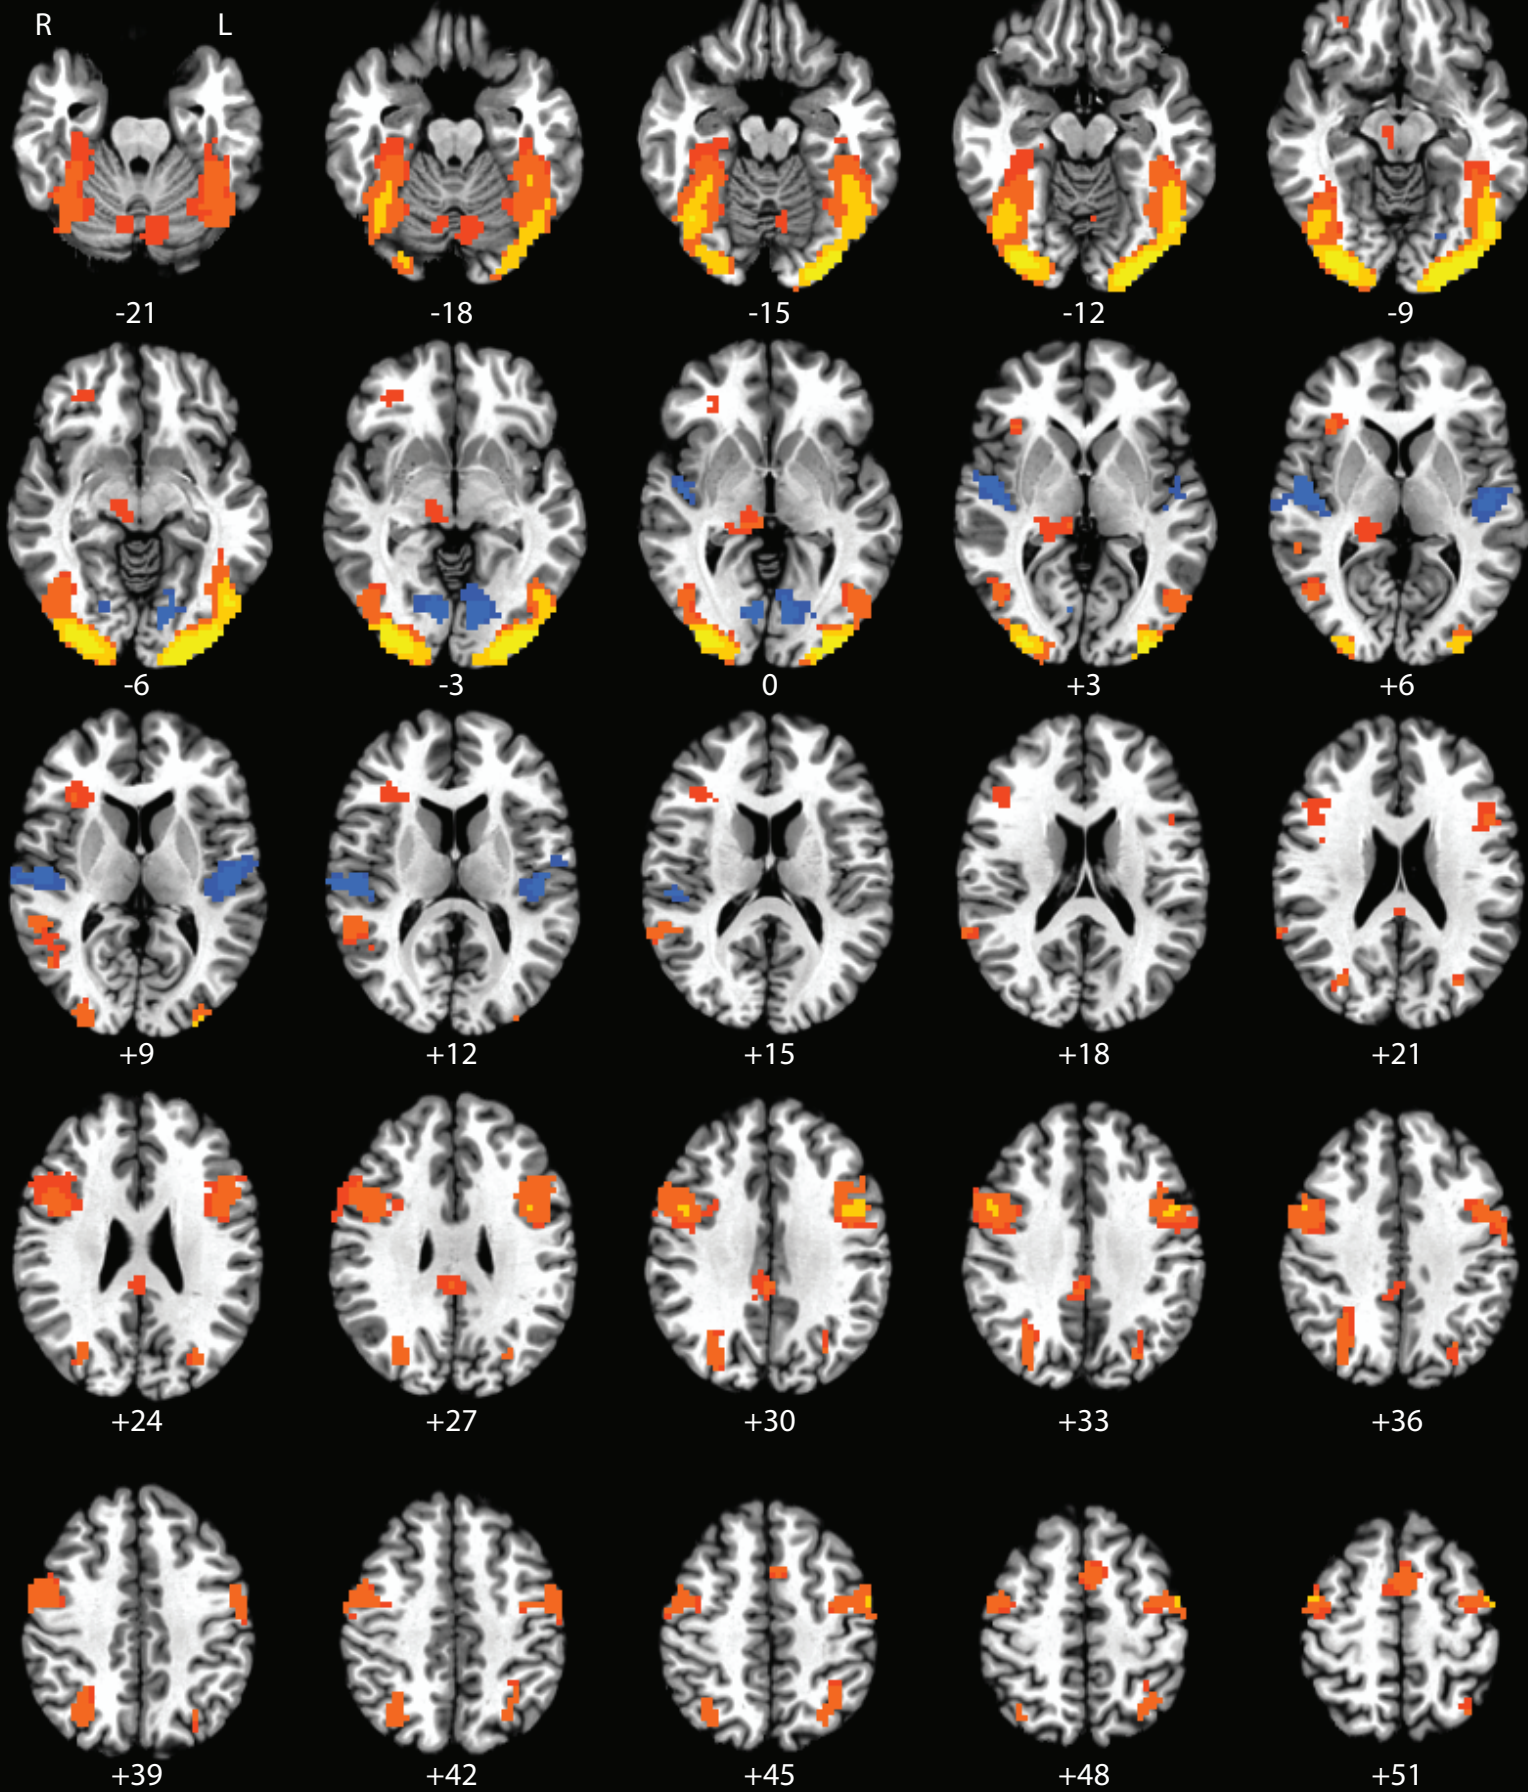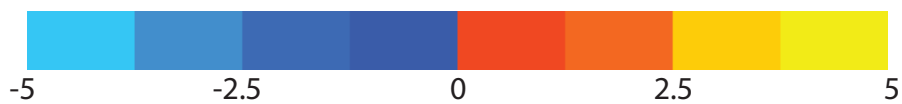

Supplement: NIHMS816621-supplement-Supplementary_Figure_4.pdf [file NIHMS816621-supplement-Supplementary_Figure_4.pdf]

# Evoked Response Map for Pseudowords

$t = 3.97$ ; voxelwise  $p = .001$ ; cluster corrected at  $p = .05$

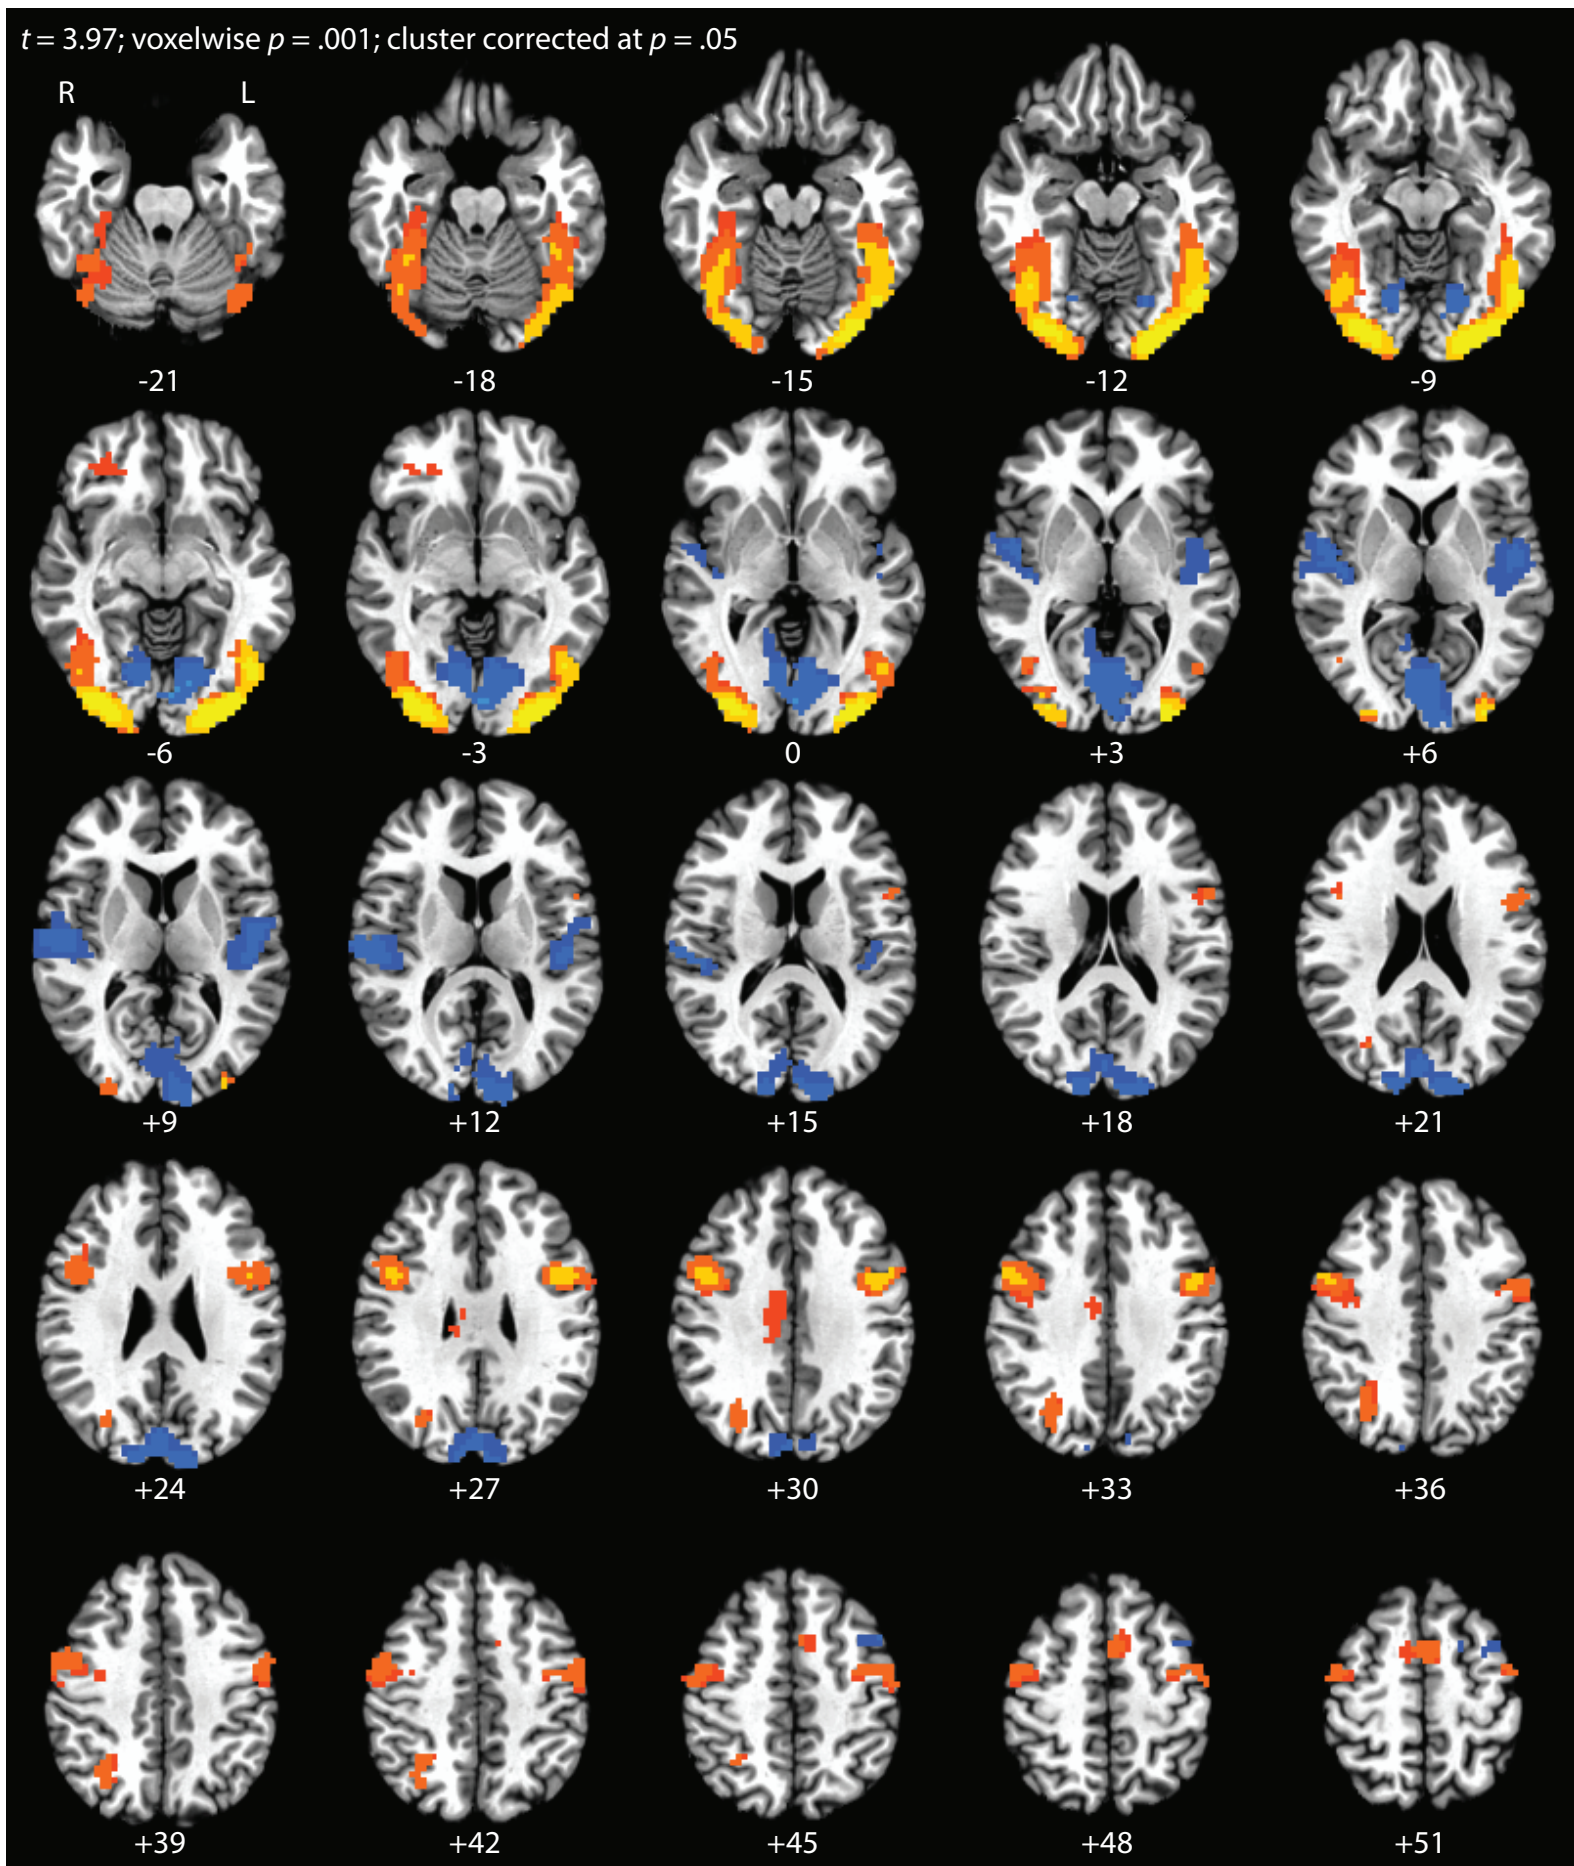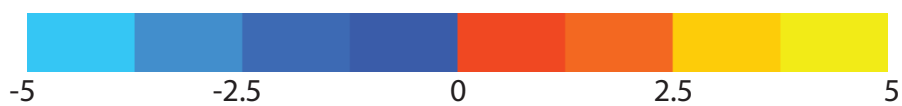

Supplement: NIHMS816621-supplement-Supplementary_Figure_5.pdf [file NIHMS816621-supplement-Supplementary_Figure_5.pdf]

# Evoked Response Map for False Font

$t = 3.97$ ; voxelwise  $p = .001$ ; cluster corrected at  $p = .05$

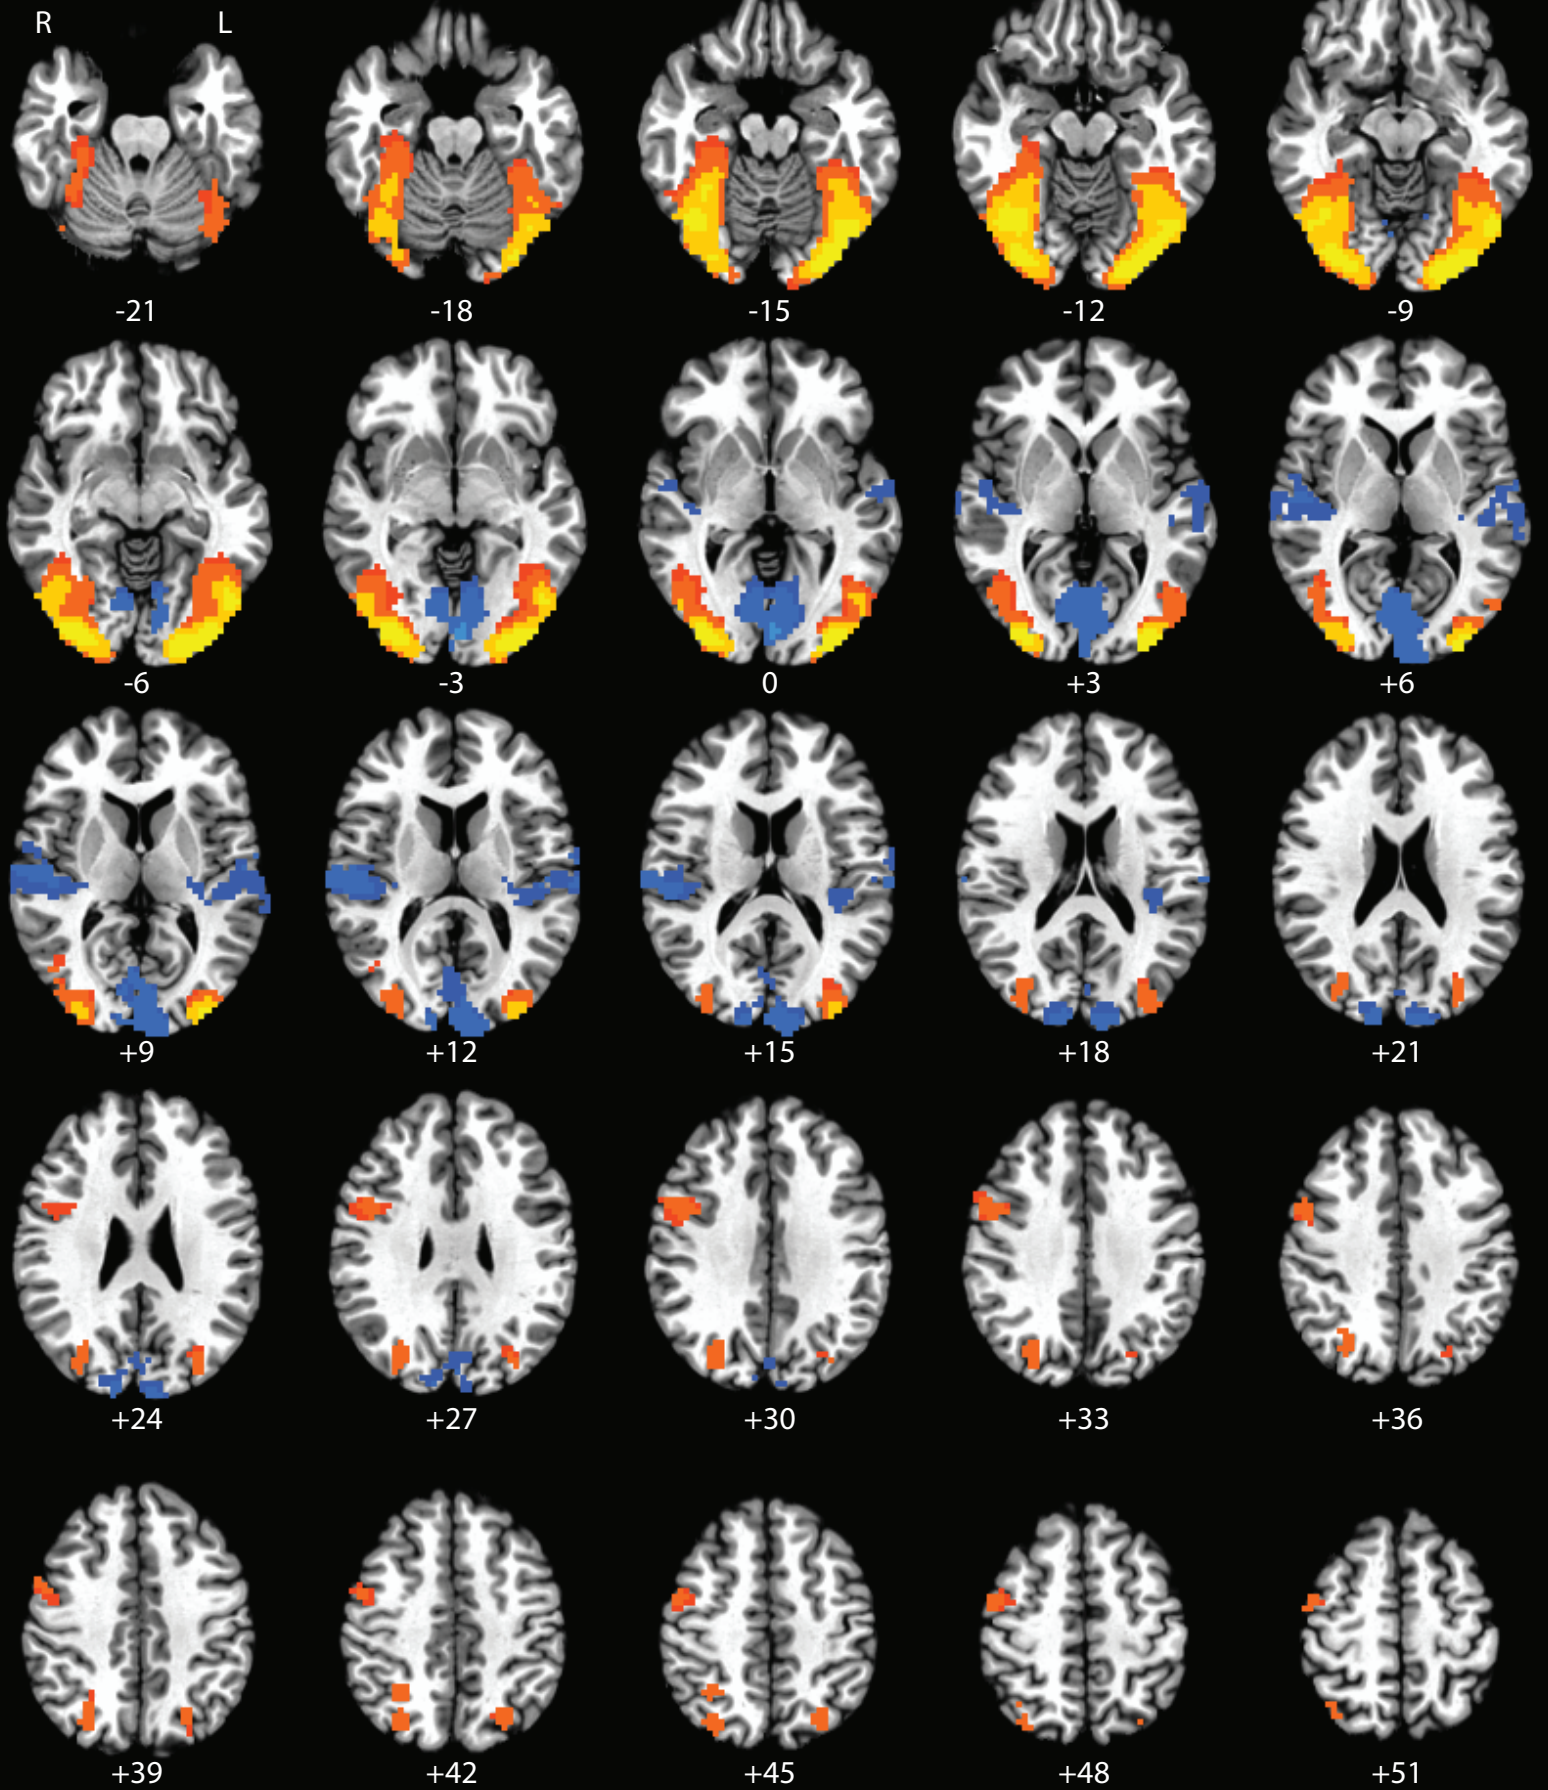

Supplement: NIHMS816621-supplement-Supplementary_Figure_6.pdf [file NIHMS816621-supplement-Supplementary_Figure_6.pdf]
